# Supplementary material for: Genetic analysis of an allergic rhinitis cohort reveals an intercellular epistasis between FAM134B and CD39
Source: PubMed Central journal article supplement (PMC4094447; doi:10.1186/1471-2350-15-73), 2014-06-27

A

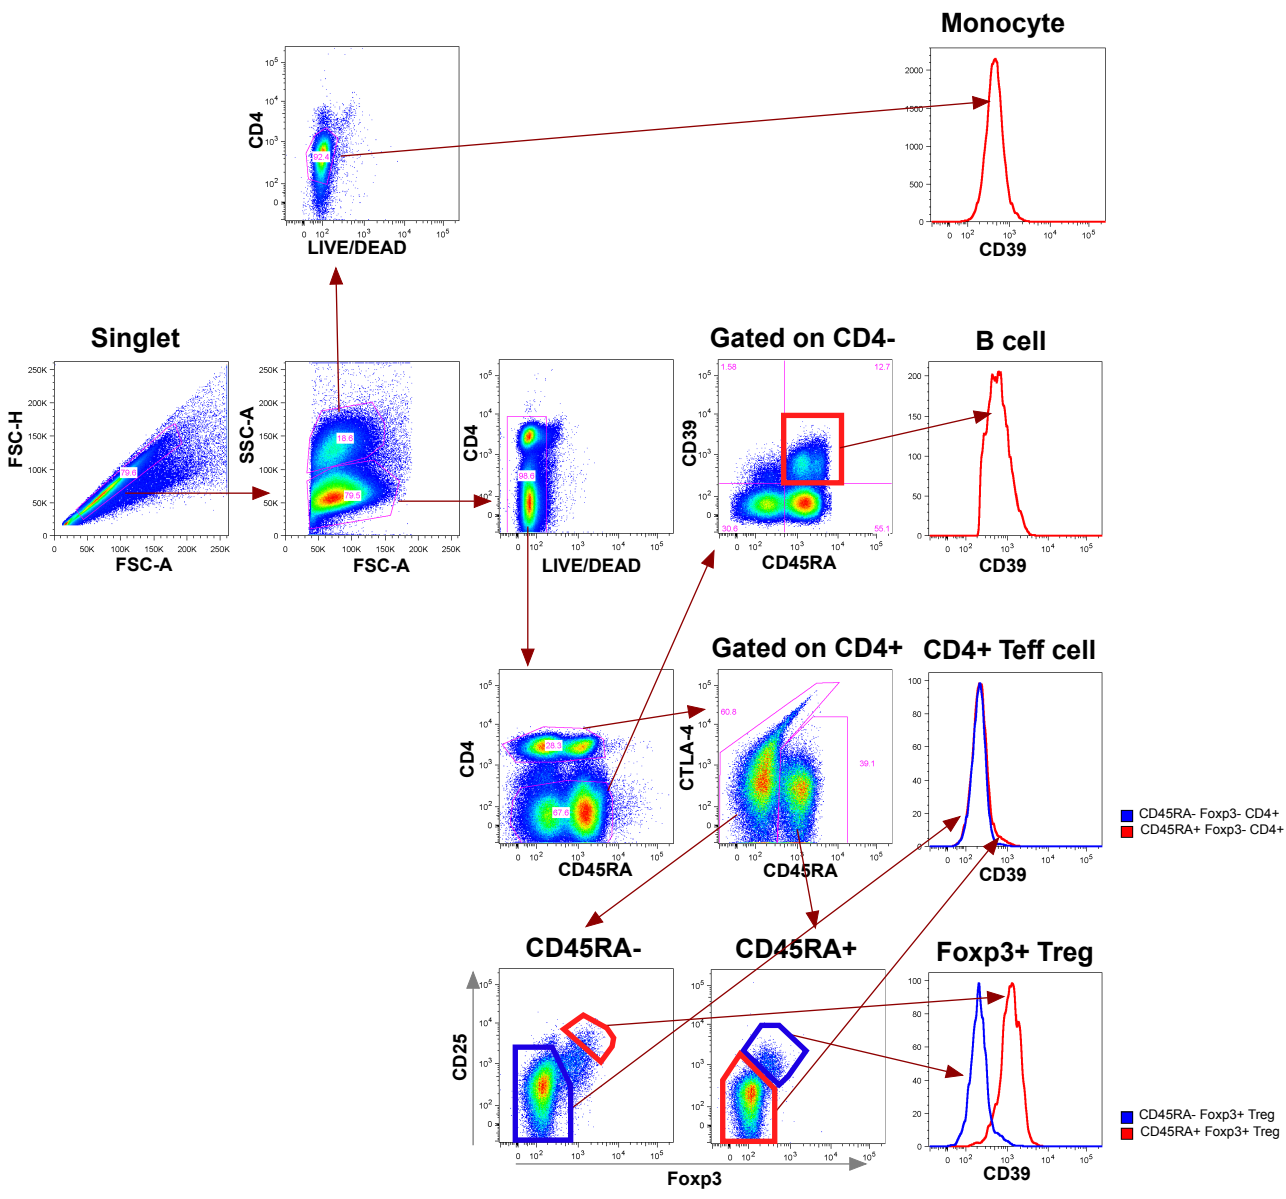

rs7071836:GG  
 ("CD39hi")

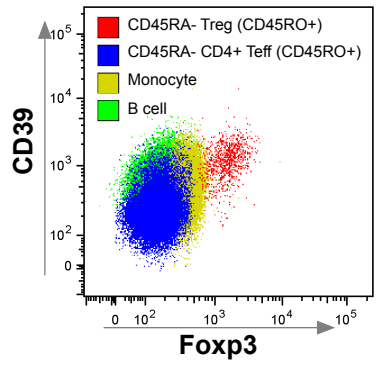

**B**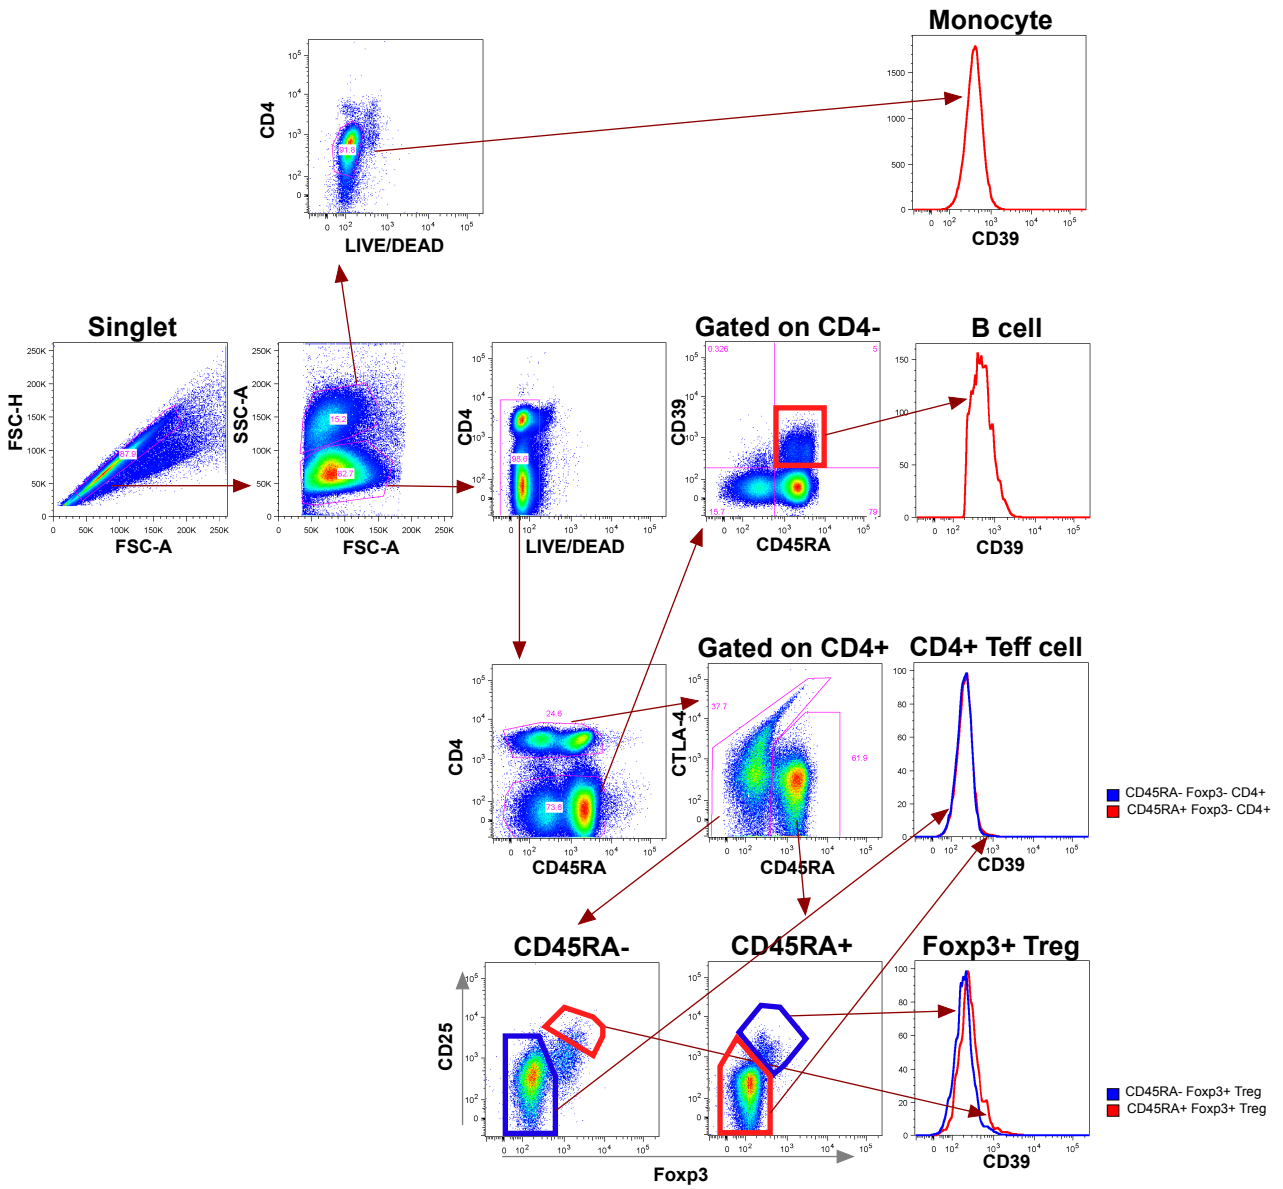

**rs7071836:AA**  
**("CD39lo")**

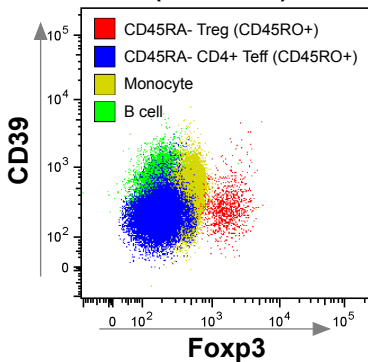

Supplement: 1471-2350-15-73-S1.pdf [file 1471-2350-15-73-S1.pdf]
