# Supplementary material for: Genetic analysis of an allergic rhinitis cohort reveals an intercellular epistasis between FAM134B and CD39
Source: PubMed Central journal article supplement (PMC4094447; doi:10.1186/1471-2350-15-73), 2014-06-27

A

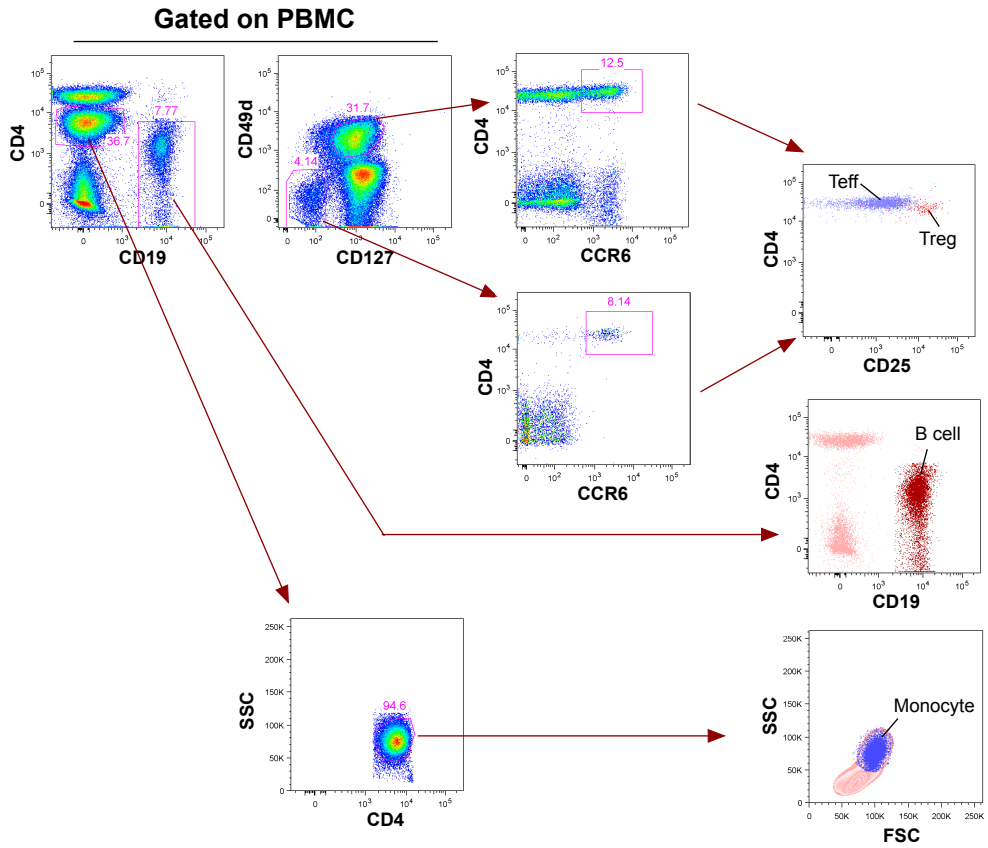

B

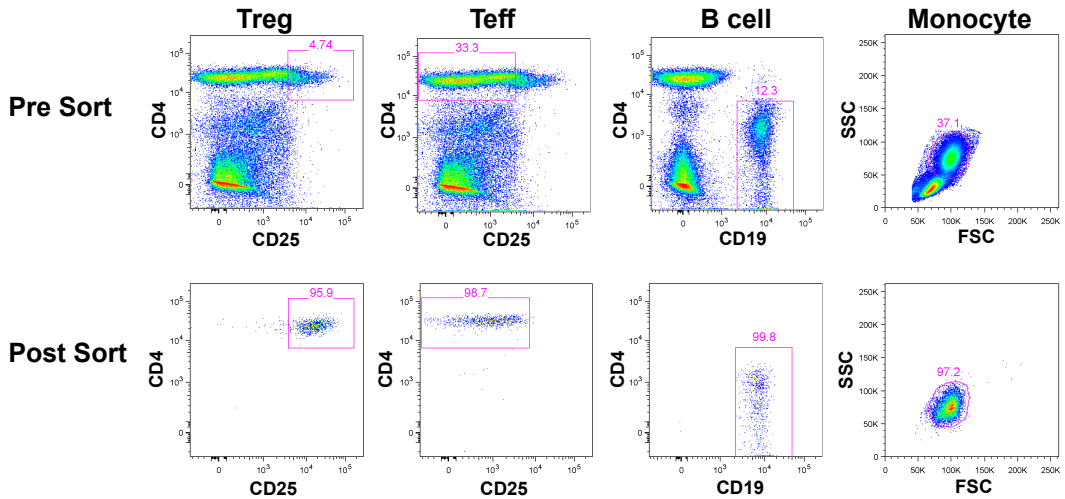

Supplement: 1471-2350-15-73-S3.pdf [file 1471-2350-15-73-S3.pdf]
